# Supplementary material for: Comparison of Muscle Strength, Aerobic Capacity and Body Composition between Healthy Adolescents and Those Living with HIV: A Systematic Review and Meta-Analysis
Source: MDPI journal article supplement (doi:10.3390/ijerph18115675), 2021-05-26
Supplement: s1 [file s1]

## MEDLINE (by PUBMED) search strategy

---

### Search strategy

---

1. child
  2. children
  3. adolescent
  4. teens
  5. teenagers
  6. human immunodeficiency virus
  7. HIV
  8. Acquired Immune Deficiency Syndrome Virus
  9. physical fitness
  10. fitness tracked
  11. physical endurance
  12. muscle strength
  13. muscular endurance
  14. physical conditioning
  15. aerobic capacity
  16. cardiorespiratory fitness
  17. flexibility
  18. pliability
  19. #1 OR #2 OR #3 OR #4 OR #5
  20. #6 OR #7 OR #8
  21. #9 OR #10 OR #11 OR #12 OR #13 OR #14 OR #15 OR #16 OR #17 OR #18
  22. #19 AND #20 AND #21
  23. #21 AND #19
-
