# Supplementary material for: Comparison of Muscle Strength, Aerobic Capacity and Body Composition between Healthy Adolescents and Those Living with HIV: A Systematic Review and Meta-Analysis
Source: MDPI journal article supplement (doi:10.3390/ijerph18115675), 2021-05-26
Supplement: s1 [file s1]

## Supplementary material

**Table S1: Studies excluded.**

| <b>Authors, year</b>        | <b>Decision</b>                        |
|-----------------------------|----------------------------------------|
| Adams et al., 2012          | Wrong design (Experiment studies)      |
| Braz et al., 2014           | No comparator group (no group control) |
| Botros et al., 2012         | Wrong design (review)                  |
| Burke et al., 2001          | No comparator group (no group control) |
| Campo et al., 2014          | Wrong population (no Children)         |
| Campbell et al., 2014       | No comparator group (no group control) |
| Crawford et al., 2013       | Wrong population (no Children)         |
| Cade et al., 2003           | Wrong population (no Children)         |
| Coodley et al., 1997        | Wrong design (Experiment studies)      |
| Coura et al., 2011          | Wrong design (review)                  |
| Chisati and Vasseljen, 2015 | Wrong population (no Children)         |
| Dellar et al., 2014         | Wrong design (Experiment studies)      |
| Evans et al., 2002          | Wrong design (Experiment studies)      |
| Fabiano et al., 2013        | No comparator group (no group control) |
| Farinatti et al., 2010      | Wrong population (no Children)         |
| Gellato et al., 2019        | No comparator group (no group control) |
| Giordano et al., 2018       | Wrong design (longitudinal studies)    |
| Gomes-Neto et al., 2018     | Wrong design (review)                  |
| Jemmont et al., 2011        | No comparator group (no group control) |
| Lox et al., 1996            | Wrong design (review)                  |
| Macdonald et al., 2017      | Wrong population (no Children)         |
| Martins et al., 2019        | No comparator group (no group control) |
| Mhariwa, 2015               | Wrong population (no Children)         |
| Malita et al., 2005         | Wrong design (review)                  |
| Malete et al., 2017         | Wrong Outcomes                         |

|                          |                                        |
|--------------------------|----------------------------------------|
| Matsudo et al., 2015     | No comparator group (no group control) |
| McDermott et al., 2017   | Wrong design (Experiment studies)      |
| Miller et al., 2010      | No comparator group (no group control) |
| Olsen et al, 2015        | Wrong population (no Children)         |
| Oliveira et al, 2017     | Wrong population (no Children)         |
| Oursler et al, 2006      | Wrong population (no Children)         |
| Patil et al, 2017        | Wrong population (no Children)         |
| Pavlinac et al., 2014    | No comparator group (no group control) |
| Penner et al., 2018      | Wrong design (review)                  |
| Pothoff et al, 1994      | Wrong population (no Children)         |
| Puthanakit et al., 2013  | No comparator group (no group control) |
| Raso et al, 2016         | Wrong population (no Children)         |
| Rhoads et al., 2011      | Wrong Outcomes                         |
| Ortmeyer et al, 2016     | Wrong population (no Children)         |
| Ousler et al., 2006      | Wrong population (no Children)         |
| Silva et al, 2015        | Wrong population (no Children)         |
| Silva et al, 2014        | Wrong population (no Children)         |
| Sonaglio et al., 2011    | No comparator group (no group control) |
| Tanaka et al., 2015      | No comparator group (no group control) |
| Trost et al., 1996       | Wrong Outcomes                         |
| Zanetti et al., 2016     | Wrong design (Experiment studies)      |
| Wallet et al, 2015       | Wrong population (no Children)         |
| Wenner                   | No comparator group (no group control) |
| Weggheleire et al., 2012 | Wrong design (review)                  |
