# Supplementary material for: Comparison of Muscle Strength, Aerobic Capacity and Body Composition between Healthy Adolescents and Those Living with HIV: A Systematic Review and Meta-Analysis
Source: MDPI journal article supplement (doi:10.3390/ijerph18115675), 2021-05-26
Supplement: s1 [file s1]

| <b>Criteria</b><br><b>Questions</b>                    | <b>Study</b>         |                      |                         |                       |                           |
|--------------------------------------------------------|----------------------|----------------------|-------------------------|-----------------------|---------------------------|
|                                                        | Cade et al.,<br>2002 | Lima et al.,<br>2017 | Martins et<br>al., 2017 | Ramos et<br>al., 2012 | Somarriba et<br>al., 2013 |
| Q1=Research question                                   | Yes                  | Yes                  | Yes                     | Yes                   | Yes                       |
| Q2 =Study population                                   | Yes                  | Yes                  | Yes                     | Yes                   | Yes                       |
| Q3= Study Population (elegíveis era de pelo menos 50%) | No                   | No                   | No                      | No                    | No                        |
| Q4=population/eligibility criteria                     | Yes                  | Yes                  | Yes                     | Yes                   | Yes                       |
| Q5=Sample size                                         | Yes                  | No                   | No                      | No                    | No                        |
| <b>Selection bias (Maximum = 5)</b>                    | <b>4</b>             | <b>3</b>             | <b>3</b>                | <b>3</b>              | <b>3</b>                  |
| Q6= Exposure assessed prior to outcome measurement     | No                   | No                   | No                      | No                    | No                        |
| Q7= Sufficient timeframe to see an effect              | No                   | No                   | No                      | No                    | No                        |
| Q8= Different levels of the exposure of interest       | No                   | No                   | No                      | No                    | No                        |
| Q9= Exposure measures and assessment                   | Yes                  | Yes                  | Yes                     | Yes                   | Yes                       |
| Q10= Repeated exposure assessment                      | No                   | No                   | No                      | No                    | No                        |
| Q11= Outcome measures                                  | Yes                  | Yes                  | Yes                     | Yes                   | Yes                       |
| Q12= Blinding of outcome assessors                     | No                   | No                   | No                      | No                    | No                        |
| <b>Measurement and outcome bias (maximum = 7)</b>      | <b>2</b>             | <b>2</b>             | <b>2</b>                | <b>2</b>              | <b>2</b>                  |
| Q13= Follow-up rate                                    | No                   | Yes                  | No                      | No                    | No                        |
| Q14 = Statistical analyses                             | Yes                  | No                   | No                      | No                    | No                        |
| <b>Data presentation (Maximum = 7)</b>                 | <b>1</b>             | <b>0</b>             | <b>2</b>                | <b>0</b>              | <b>0</b>                  |
| <b>Total score</b>                                     | <b>7</b>             | <b>6</b>             | <b>5</b>                | <b>5</b>              | <b>5</b>                  |
